# Supplementary material for: A Comprehensive View of the ASM1 Dynamic Model: Study on a Practical Case
Source: MDPI journal article supplement (doi:10.3390/w14071046), 2022-03-26
Supplement: s1 [file s1]

## SUPPLEMENTARY MATERIAL

Costa C. A comprehensive view of the ASM1

**Table S1.** Table of errors between simulated values (Sim) and analysed values (COD) for fine tuning,  $Y_H = 0.60$  and  $\mu_{H,max} = 0.40, 0.38$  and  $0.42 \text{ d}^{-1}$ .

| Day | COD (mg/L) | Sim 0.40 | Error (%) 0.40 | Sim 0.38 | Error (%) 0.38 | Sim 0.42 | Error (%) 0.42 |
|-----|------------|----------|----------------|----------|----------------|----------|----------------|
| 1   | 23.7       | 30.0     | 26.6           | 30.0     | 26.6           | 30.0     | 26.6           |
| 5   | 32.9       | 22.7     | -31.0          | 25.5     | -22.5          | 21.5     | -34.5          |
| 7   | 27.3       | 14.9     | -45.4          | 16.0     | -41.3          | 14.2     | -48.0          |
| 12  | 25.3       | 11.8     | -53.5          | 12.6     | -50.2          | 11.1     | -56.0          |
| 14  | 24.1       | 14.7     | -39.1          | 15.6     | -35.4          | 15.2     | -36.9          |
| 19  | 21.6       | 24.5     | 13.5           | 26.5     | 22.8           | 22.7     | 5.0            |
| 21  | 21.0       | 24.2     | 15.3           | 26.3     | 25.3           | 22.1     | 5.4            |
| 26  | 27.2       | 27.6     | 1.4            | 27.9     | 2.4            | 25.1     | -7.8           |
| 29  | 34.1       | 31.0     | -9.2           | 33.8     | -0.8           | 28.5     | -16.5          |
| 33  | 29.3       | 34.3     | 17.0           | 37.5     | 28.0           | 31.8     | 8.4            |
| 35  | 31.1       | 37.6     | 21.0           | 41.7     | 34.0           | 34.7     | 11.6           |
| 40  | 25.9       | 21.6     | -16.5          | 23.6     | -8.9           | 20.1     | -22.6          |
| 42  | 25.6       | 21.0     | -17.9          | 23.5     | -8.3           | 20.0     | -21.8          |
| 47  | 23.7       | 17.7     | -25.4          | 18.9     | -20.4          | 16.2     | -31.8          |
| 49  | 23.9       | 21.5     | -10.2          | 22.8     | -4.8           | 20.0     | -16.5          |
| 54  | 26.2       | 19.2     | -26.7          | 21.0     | -19.9          | 17.4     | -33.6          |
| 56  | 23.7       | 24.3     | 2.6            | 25.8     | 8.9            | 22.5     | -5.2           |
| 61  | 18.6       | 12.4     | -33.2          | 13.3     | -28.5          | 11.9     | -36.1          |
| 63  | 24.3       | 27.3     | 12.2           | 30.2     | 24.2           | 25.5     | 5.0            |
| 68  | 45.6       | 23.5     | -48.4          | 25.4     | -44.3          | 21.7     | -52.5          |
| 70  | 22.4       | 16.4     | -26.9          | 17.8     | -20.5          | 15.7     | -29.8          |
| 77  | 31.4       | 69.7     | 122.1          | 78.7     | 150.7          | 65.1     | 107.4          |
| 82  | 25.9       | 21.9     | -15.3          | 24.1     | -7.0           | 19.5     | -24.8          |
| 84  | 40.6       | 10.3     | -74.7          | 11.0     | -72.8          | 9.7      | -76.1          |
| 89  | 21.5       | 9.4      | -56.2          | 11.0     | -48.7          | 8.8      | -59.0          |
| 91  | 21.5       | 16.2     | -24.4          | 17.6     | -18.2          | 14.4     | -33.1          |
| 96  | 21.1       | 19.2     | -9.0           | 25.1     | 19.1           | 21.8     | 3.1            |
| 98  | 19.3       | 36.7     | 90.0           | 38.5     | 99.3           | 33.5     | 73.7           |
| 105 | 26.7       | 18.2     | -31.7          | 19.8     | -25.7          | 17.6     | -34.3          |
| 113 | 27.5       | 27.7     | 0.9            | 29.8     | 8.3            | 29.1     | 5.8            |
| 118 | 29.9       | 23.1     | -22.6          | 23.2     | -22.6          | 19.6     | -34.5          |
| 120 | 35.0       | 33.5     | -4.2           | 37.0     | 5.7            | 30.9     | -11.6          |
| 125 | 17.8       | 17.1     | -4.2           | 18.5     | 3.8            | 15.7     | -11.8          |
| 127 | 22.7       | 16.2     | -28.6          | 17.9     | -21.2          | 15.3     | -32.7          |
| 132 | 37.0       | 25.5     | -31.2          | 27.1     | -26.9          | 22.9     | -38.1          |
| 134 | 30.2       | 36.9     | 22.1           | 40.6     | 34.4           | 34.0     | 12.5           |
| 135 | 26.7       | 16.5     | -38.1          | 18.6     | -30.2          | 15.5     | -42.1          |
| 139 | 26.9       | 21.6     | -19.7          | 23.5     | -12.6          | 20.0     | -25.6          |
| 141 | 25.0       | 18.9     | -24.4          | 19.4     | -22.5          | 16.8     | -32.6          |
| 147 | 27.2       | 36.2     | 33.1           | 40.3     | 48.2           | 33.2     | 22.1           |
| 149 | 28.3       | 31.3     | 10.8           | 34.4     | 21.6           | 29.1     | 2.9            |
| 153 | 23.6       | 42.0     | 77.8           | 45.7     | 93.7           | 38.2     | 61.8           |
| 155 | 15.4       | 9.5      | -38.2          | 9.7      | -37.0          | 9.0      | -41.5          |
| 160 | 18.1       | 20.2     | 11.5           | 21.8     | 20.5           | 18.8     | 3.7            |
| 162 | 20.2       | 21.8     | 7.7            | 22.1     | 9.6            | 19.4     | -4.2           |
| 167 | 27.6       | 35.4     | 28.3           | 39.0     | 41.2           | 32.6     | 18.0           |
| 169 | 33.2       | 28.7     | -13.5          | 32.4     | -2.4           | 26.4     | -20.4          |
| 173 | 23.2       | 12.8     | -45.0          | 14.0     | -39.7          | 11.9     | -48.6          |

## SUPPLEMENTARY MATERIAL

Costa C. A comprehensive view of the ASM1

|               |      |      |       |      |       |      |       |
|---------------|------|------|-------|------|-------|------|-------|
| 175           | 25.8 | 38.1 | 47.6  | 39.1 | 51.4  | 34.5 | 33.6  |
| 180           | 33.9 | 26.9 | -20.5 | 28.7 | -15.3 | 24.5 | -27.8 |
| 182           | 25.9 | 47.0 | 81.3  | 52.5 | 102.8 | 44.7 | 72.6  |
| 187           | 24.7 | 19.0 | -23.1 | 19.7 | -20.3 | 17.2 | -30.3 |
| 189           | 17.7 | 23.0 | 30.1  | 24.8 | 40.1  | 21.3 | 20.4  |
| 194           | 27.3 | 21.1 | -22.8 | 22.2 | -18.6 | 19.4 | -28.9 |
| 195           | 24.1 | 34.2 | 41.9  | 36.1 | 49.8  | 32.9 | 36.5  |
| 197           | 12.6 | 48.0 | 281.2 | 53.7 | 326.2 | 42.5 | 237.3 |
| 203           | 18.6 | 25.5 | 37.3  | 26.5 | 42.3  | 22.4 | 20.7  |
| 208           | 24.9 | 51.9 | 108.5 | 56.0 | 124.9 | 47.7 | 91.6  |
| 210           | 23.5 | 28.6 | 21.6  | 30.1 | 28.1  | 25.6 | 8.9   |
| 215           | 29.5 | 32.6 | 10.5  | 36.3 | 23.1  | 28.1 | -4.9  |
| 222           | 26.9 | 55.1 | 105.0 | 60.2 | 123.8 | 54.1 | 101.0 |
| 229           | 37.3 | 77.6 | 108.0 | 89.7 | 140.6 | 72.4 | 94.2  |
| 232           | 38.9 | 59.7 | 53.4  | 66.5 | 70.8  | 54.3 | 39.6  |
| 236           | 32.1 | 30.4 | -5.3  | 33.5 | 4.5   | 28.2 | -12.0 |
| 239           | 30.5 | 35.9 | 17.7  | 39.3 | 28.7  | 32.8 | 7.5   |
| 243           | 30.7 | 38.1 | 24.2  | 40.4 | 31.7  | 35.1 | 14.3  |
| 246           | 23.5 | 16.3 | -30.5 | 17.3 | -26.4 | 16.4 | -30.3 |
| 250           | 53.2 | 27.8 | -47.8 | 29.7 | -44.2 | 24.7 | -53.6 |
| 253           | 58.1 | 43.2 | -25.6 | 47.7 | -17.8 | 39.2 | -32.5 |
| 257           | 49.5 | 45.6 | -7.9  | 50.8 | 2.6   | 41.4 | -16.4 |
| 260           | 28.1 | 6.7  | -76.1 | 7.8  | -72.3 | 6.8  | -75.9 |
| 264           | 33.3 | 16.3 | -51.0 | 17.2 | -48.5 | 15.2 | -54.4 |
| 267           | 24.0 | 14.6 | -39.3 | 14.0 | -41.7 | 13.6 | -43.3 |
| 271           | 20.3 | 8.6  | -57.4 | 9.4  | -53.7 | 8.4  | -58.7 |
| 274           | 24.8 | 11.6 | -53.1 | 12.4 | -50.1 | 10.8 | -56.4 |
| 278           | 20.7 | 12.2 | -41.2 | 13.6 | -34.4 | 11.6 | -43.9 |
| 281           | 27.4 | 18.1 | -33.8 | 19.5 | -28.7 | 16.9 | -38.4 |
| 285           | 32.1 | 17.6 | -45.1 | 19.1 | -40.6 | 16.7 | -48.0 |
| 288           | 23.6 | 9.3  | -60.7 | 8.1  | -65.8 | 8.0  | -66.1 |
| 292           | 24.1 | 24.7 | 2.4   | 26.8 | 11.3  | 21.4 | -11.1 |
| 295           | 26.8 | 28.2 | 5.2   | 30.7 | 14.5  | 26.2 | -2.3  |
| 299           | 28.8 | 35.7 | 24.0  | 37.8 | 31.4  | 31.6 | 9.8   |
| 301           | 24.3 | 28.1 | 15.4  | 30.6 | 25.7  | 25.9 | 6.5   |
| 306           | 26.9 | 28.2 | 5.0   | 33.4 | 24.3  | 26.2 | -2.6  |
| 309           | 47.6 | 36.7 | -22.9 | 40.0 | -15.9 | 33.3 | -30.0 |
| 313           | 28.6 | 32.2 | 12.6  | 35.4 | 23.6  | 30.8 | 7.6   |
| 320           | 30.8 | 22.1 | -28.1 | 24.3 | -21.2 | 20.3 | -34.2 |
| 323           | 27.1 | 20.1 | -26.0 | 21.7 | -19.9 | 18.6 | -31.3 |
| 327           | 22.7 | 19.9 | -12.3 | 22.1 | -2.5  | 19.5 | -14.3 |
| 334           | 24.5 | 23.7 | -3.4  | 26.3 | 7.5   | 23.1 | -5.9  |
| 336           | 27.4 | 20.9 | -23.8 | 22.3 | -18.4 | 19.4 | -29.1 |
| 341           | 62.1 | 19.4 | -68.7 | 20.8 | -66.5 | 18.4 | -70.4 |
| 343           | 19.9 | 38.8 | 94.8  | 42.1 | 111.8 | 35.8 | 79.9  |
| Average error |      |      | -0.5  |      | 8.1   |      | -7.7  |
